# Supplementary material for: Structural change from homogenous structure to staging in benzoic acid intercalated LDH: experimental and molecular dynamics simulation insights
Source: Royal Society of Chemistry journal article supplement (doi:10.1039/c2cp40674h), 2012-01-01
Supplement: c2cp40674h.pdf [file c2cp40674h.pdf]

## Electronic Supplementary Information (ESI)

### Structural change from homogenous structure to staging in benzoic acid intercalated LDH: experimental and molecular dynamics simulation insights

5 Yanru Zhang,<sup>a</sup> Hongwei Tan,<sup>a</sup> Jing-xiang Zhao,<sup>b</sup> Xinxin Li,<sup>c</sup> Hui Ma,<sup>c</sup> Xiaoduan Chen,<sup>c</sup> and Xiaojing Yang<sup>\*a</sup>

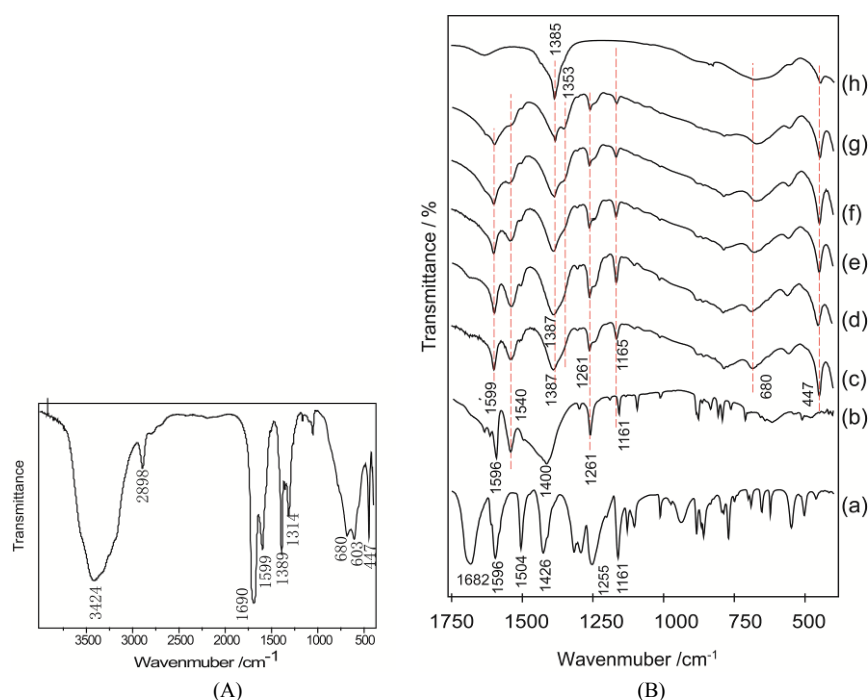

10

**Fig. S1** (A) FT-IR spectrum of C-0.25 in formamide (B) FT-IR spectra of (a) OBA raw material, (b) OBA deprotonated with NaOH, and the water-washed samples (c) C-2, (d) C-1, (e) C-0.5, (f) C-0.25, (g) C-0.125, and (h) NO<sub>3</sub><sup>-</sup>-LDH after drying at 100 °C *in vacuo*.

In the spectra, the bands at 1682 and 1426 cm<sup>-1</sup> were assigned to characteristic absorption band of carboxyl group (-COOH) in OBA molecule. They shifted to lower wave numbers at 1596 and 1400 cm<sup>-1</sup>, corresponding to the  $\nu_{as}$  and  $\nu_s$  vibrations of -COO<sup>-</sup> in OBA<sup>2-</sup> anions. The presence of the vibrations of benzene ring at 1540 cm<sup>-1</sup>, and the Mg(Al)-O stretching vibrations at 680 and 447 cm<sup>-1</sup> suggested that the coassembly of OBA<sup>2-</sup> with LDH. The bands of 1384 and 1354 cm<sup>-1</sup> are characteristic of NO<sub>3</sub><sup>-</sup> and CO<sub>3</sub><sup>2-</sup>, respectively. The former is shown for the NO<sub>3</sub><sup>-</sup>-LDH (Fig. S1B-h), C-0.5, C-0.125 and C-0.25 samples, but is not distinct for C-2 and C-1 because the band at 1387 cm<sup>-1</sup> may be due to the  $\nu_s$  vibration of -COO<sup>-</sup>. The CO<sub>3</sub><sup>2-</sup> band at 1354 cm<sup>-1</sup> could be found in the patterns of C-0.125 and C-0.25, but became a shoulder for other samples.

20

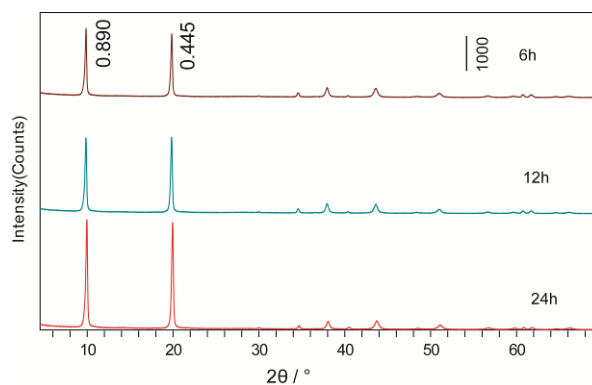

**Fig. S2** XRD patterns of the samples NO<sub>3</sub><sup>-</sup>-LDH heating at 100 °C for 24 h, 12 h and 6 h, respectively;  $d$ -value in nanometers.

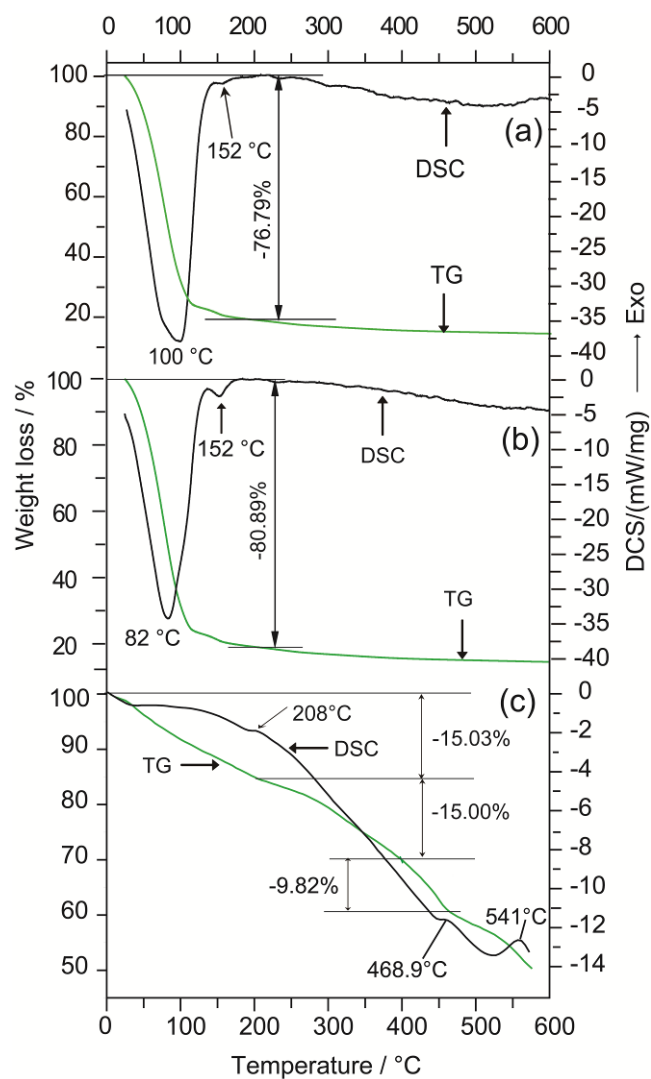

**Fig. S3** TG and DSC curves of (a) C-1 and (b) C-0.25 in wet state after water-washing, and (c) C-0.25 drying at 100 °C *in vacuo*.

5 The TG curves exhibited that water lost in a large amount during heating till 100 °C and became smaller from 100 to ~200 °C corresponding to two endothermic peaks in DSC curves, respectively.

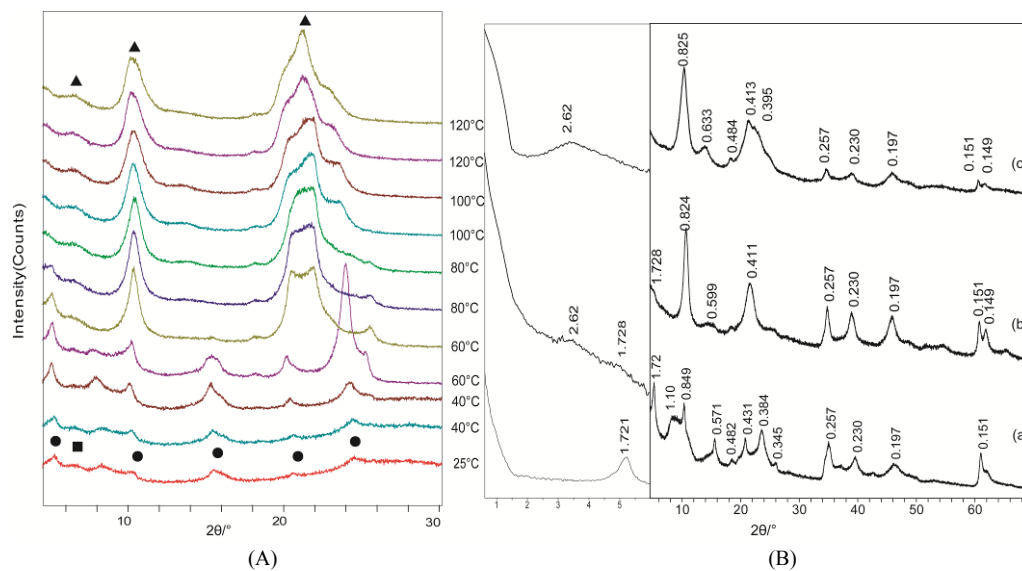

Fig. S4 (A) *In situ* XRD patterns of C-0.25 in the temperature range 25-120 °C (B) XRD patterns of the sample at different drying temperatures (a) 40 °C, (b) 80 °C, (c) 120 °C; *d*-value in nanometers.

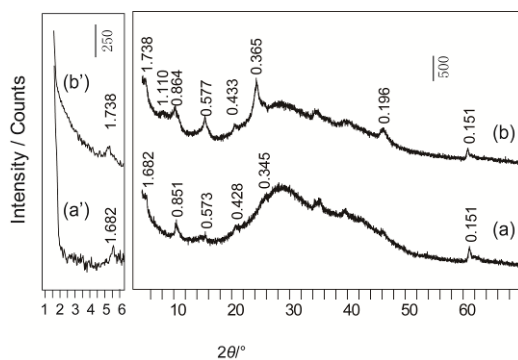

Fig. S5 XRD patterns of (a, a') C-1 and (b, b') C-0.25 after the dried samples immersed in degassed water for 24 h; *d*-value in nanometers.

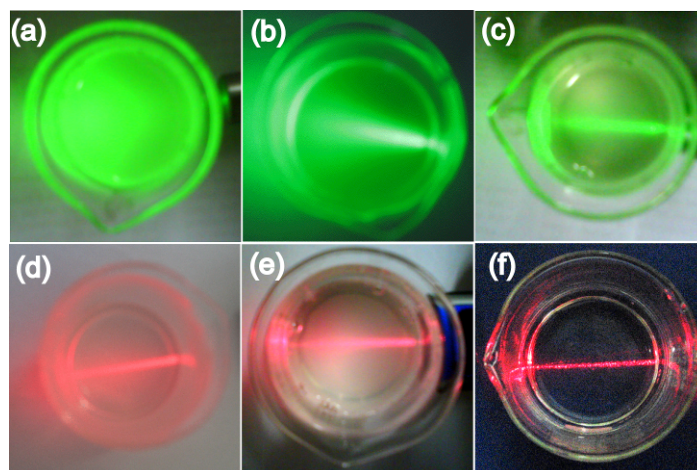

Fig. S6 Tyndall light scattering behaviours of the samples of (a) C-2, (b) C-1, (c) C-0.5, (d) C-0.25 and (e) C-0.125 after OBA<sup>2-</sup> added into the colloidal suspension of LDH in formamide (f).

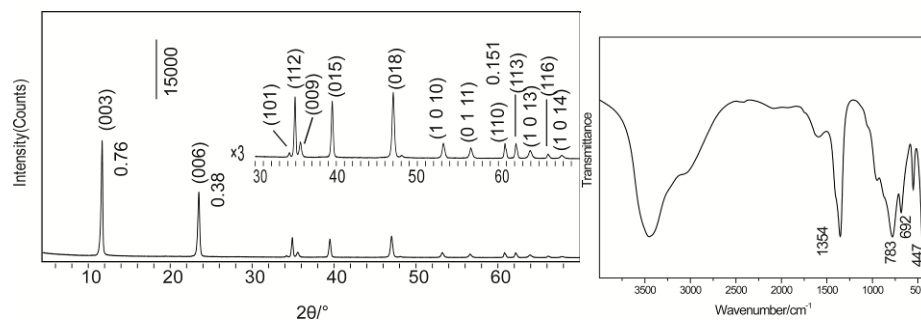

**Fig. S7** XRD pattern and FT-IR spectrum of  $\text{CO}_3^{2-}$ -LDH;  $d$ -value in nanometers.

In the XRD pattern of the  $\text{CO}_3^{2-}$ -LDH sample, all the diffraction peaks could be indexed to a hexagonal symmetry with the lattice parameters  $a = 0.30444(1)$ ,  $c = 2.27059(8)$  nm. In the FT-IR, the bands at 1354 was the characteristic of  $\text{CO}_3^{2-}$ .
